# Supplementary material for: HuR Reduces Radiation-Induced DNA Damage by Enhancing Expression of ARID1A
Source: MDPI journal article supplement (doi:10.3390/cancers11122014), 2019-12-13
Supplement: s1 [file s1]

# HuR Reduces Radiation-Induced DNA Damage by Enhancing Expression of ARID1A

Daniel Andrade, Meghna Mehta, James Griffith <sup>1</sup>, Sangphil Oh, Joshua Corbin <sup>4</sup>, Anish Babu, Supriyo De, Allshine Chen, Yan D. Zhao, Sanam Husain, Sudeshna Roy, Liang Xu, Jeffrey Aube, Ralf Janknecht, Myriam Gorospe, Terence Herman, Ramesh Rajagopal and Anupama Munshi

## Supplementary Materials

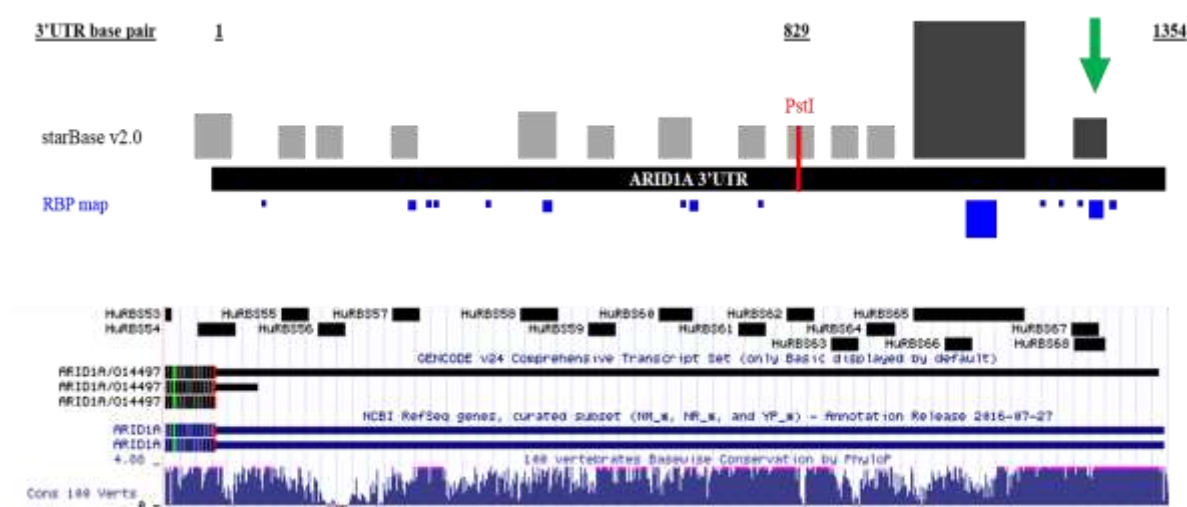

**Figure 1.** HuR binding sites on ARID1A 3'UTR. ARID1A 3'UTR region showing potential HuR-binding sites by two different online tools (starBase and RBP map). It also shows the relative position of PstI cleavage that delimits segment-1 and segment-2. The arrow shows a region on ARID1A 3'UTR that contains common predicted HuR binding sites that are also highly conserved in 100 species.

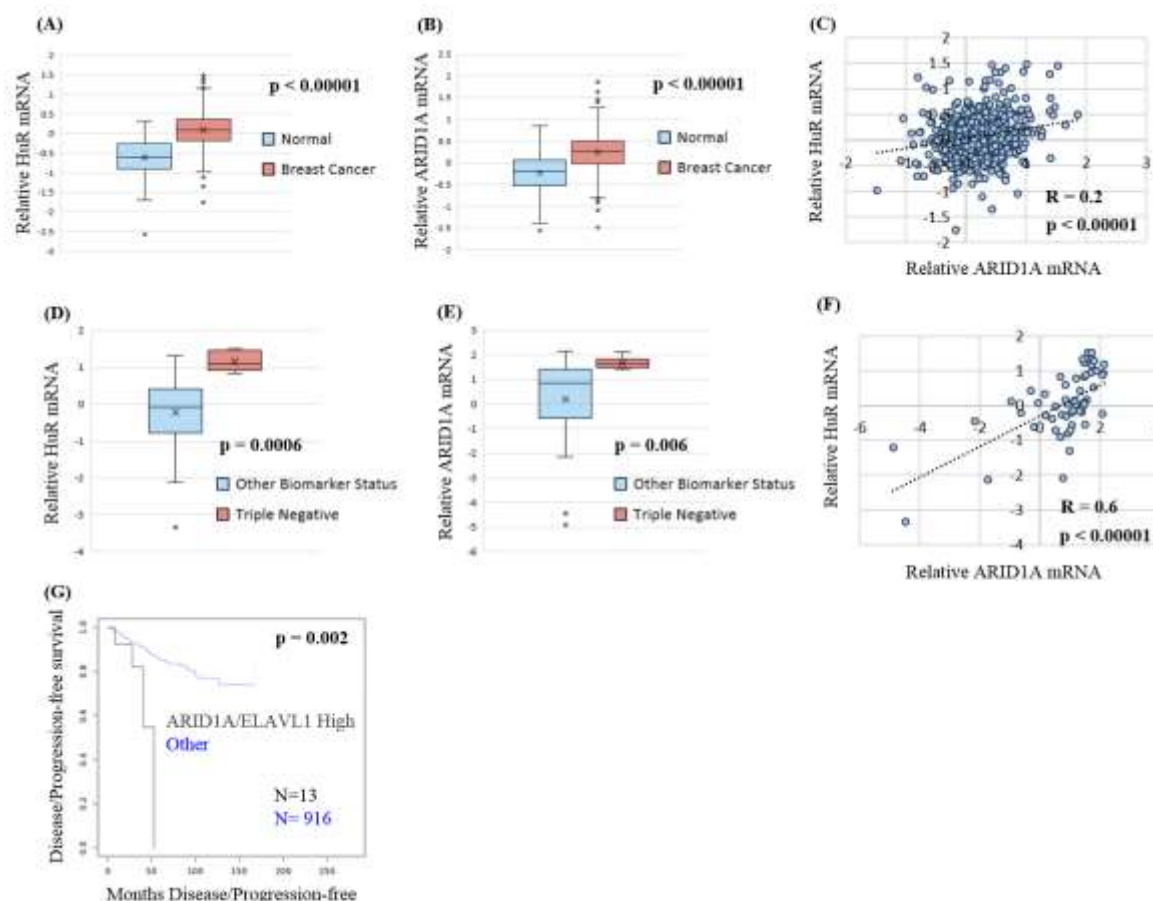

**Figure 2.** HuR and ARID1A expression levels correlate *in vivo*. (A–C) TCGA study shows elevated levels of HuR mRNA (A\_23\_P388681) and ARID1A mRNA (A\_24\_P92951) with moderate correlation in breast cancer patients. (D–F) Stickeler study shows elevated levels of HuR mRNA (A\_23\_P388681) and ARID1A mRNA (A\_24\_P92951) with a strong correlation in TNBC patients. (G) Disease free survival curve of breast cancer patients expressing high levels of both HuR and ARID1A.
