# Supplementary material for: HuR Reduces Radiation-Induced DNA Damage by Enhancing Expression of ARID1A
Source: MDPI journal article supplement (doi:10.3390/cancers11122014), 2019-12-13
Supplement: s1 [file s1]

**Fig 1 C**

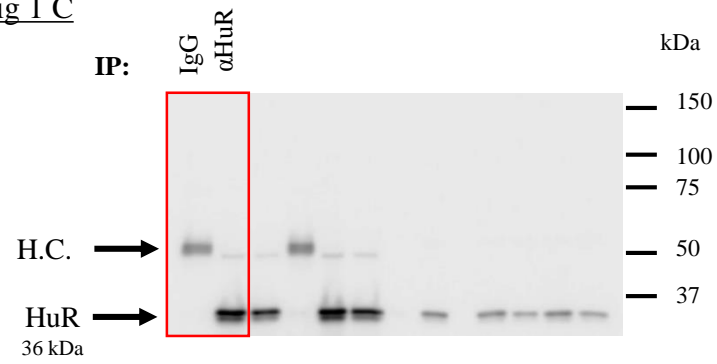

**Fig 1 F**

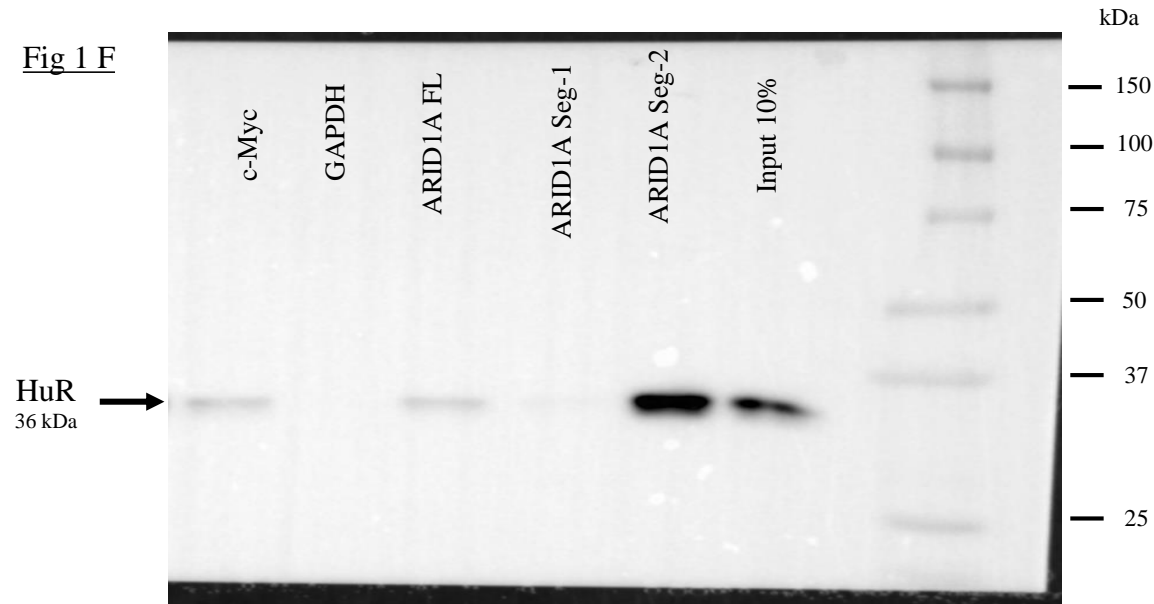

| c-myc | GAPDH | ARID1A FL | ARID1A Seg-1 | ARID1A Seg-2 | Input |
|-------|-------|-----------|--------------|--------------|-------|
| 1.2   | 0     | 1         | 0.1          | 4.7          | 3.8   |

Fig 2 A

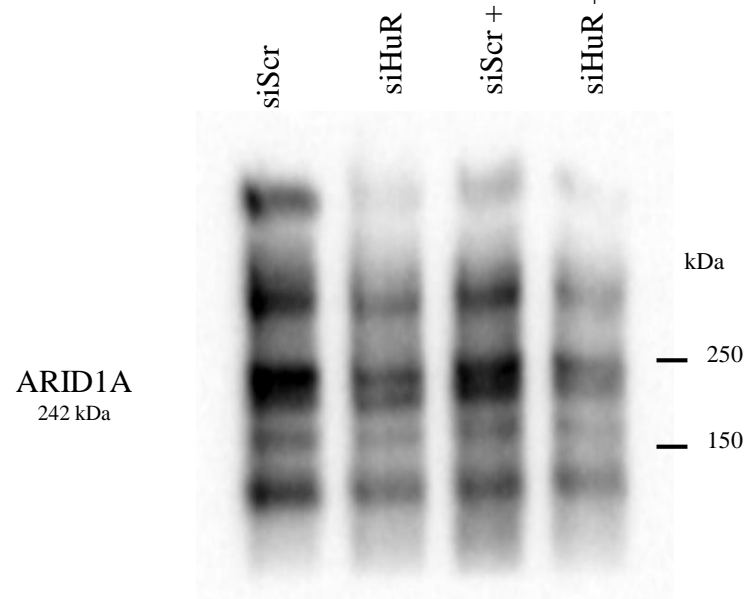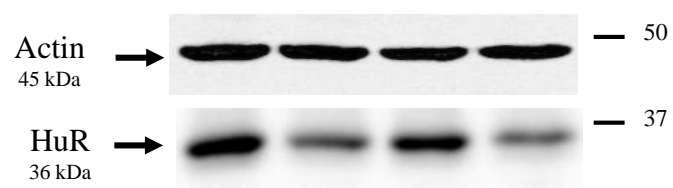

|        | siScr | siHuR | siScr+5Gy | siHuR+5Gy |
|--------|-------|-------|-----------|-----------|
| ARID1A | 1     | 0.7   | 1         | 0.5       |
| HuR    | 1     | 0.6   | 0.9       | 0.6       |
| Actin  | 1     | 1     | 1         | 1         |

Fig 2 B

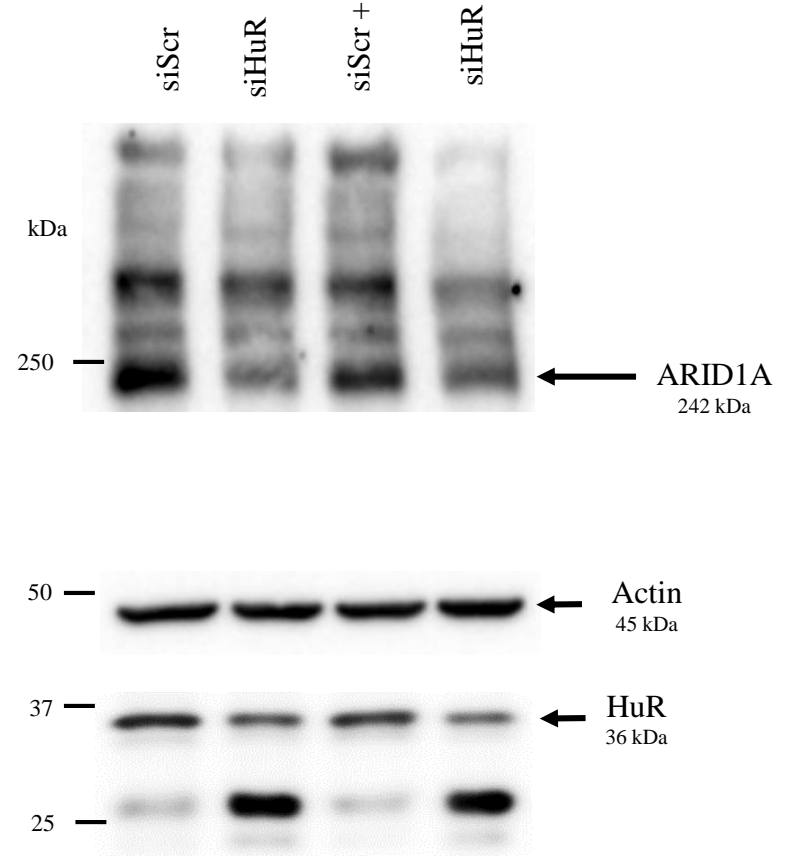

|        | siScr | siHuR | siScr+5Gy | siHuR+5Gy |
|--------|-------|-------|-----------|-----------|
| ARID1A | 1     | 0.6   | 1.1       | 0.7       |
| HuR    | 1     | 0.7   | 1         | 0.5       |
| Actin  | 1     | 1     | 1         | 1         |

Fig 2 E

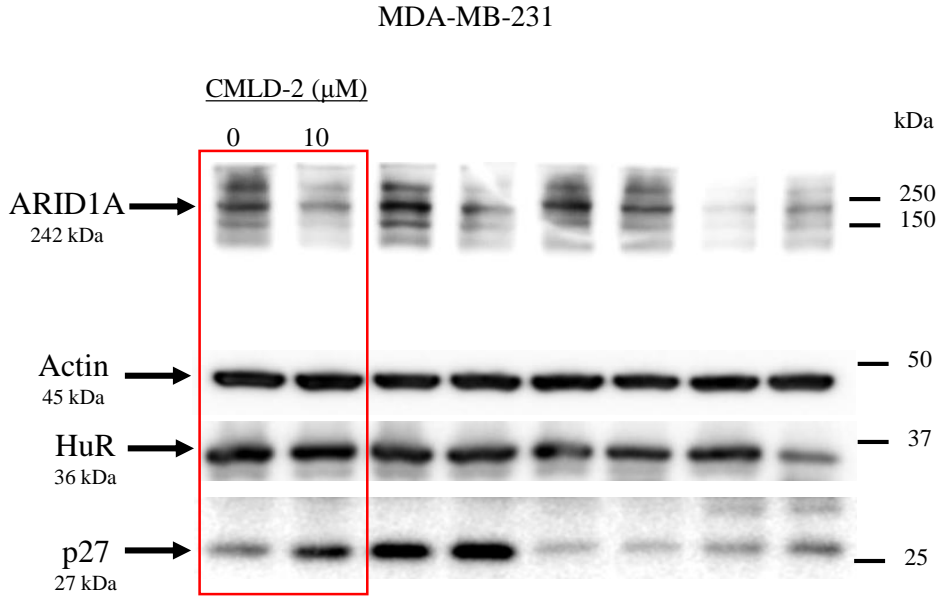

|        | 0 uM | 10 uM |
|--------|------|-------|
| ARID1A | 1    | 0.6   |
| HuR    | 1    | 1     |
| p27    | 1    | 1.7   |
| Actin  | 1    | 1     |

Fig 2 F

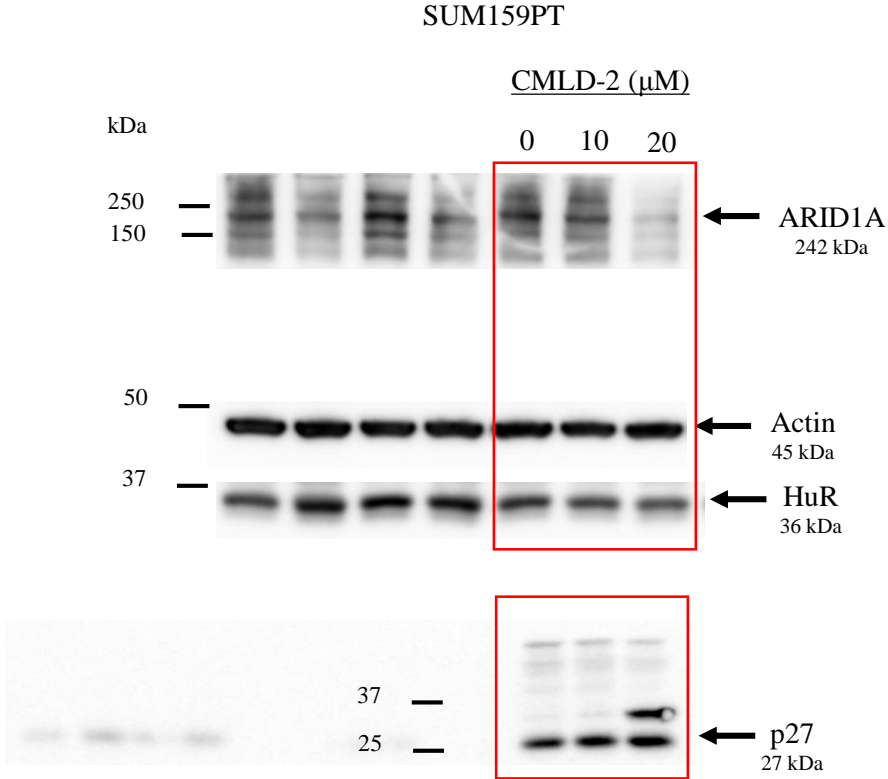

|        | 0 | 10  | 20  |
|--------|---|-----|-----|
| ARID1A | 1 | 1.1 | 0.3 |
| HuR    | 1 | 1   | 0.9 |
| p27    | 1 | 1.5 | 1.6 |
| Actin  | 1 | 1   | 1   |

**Fig 3A**

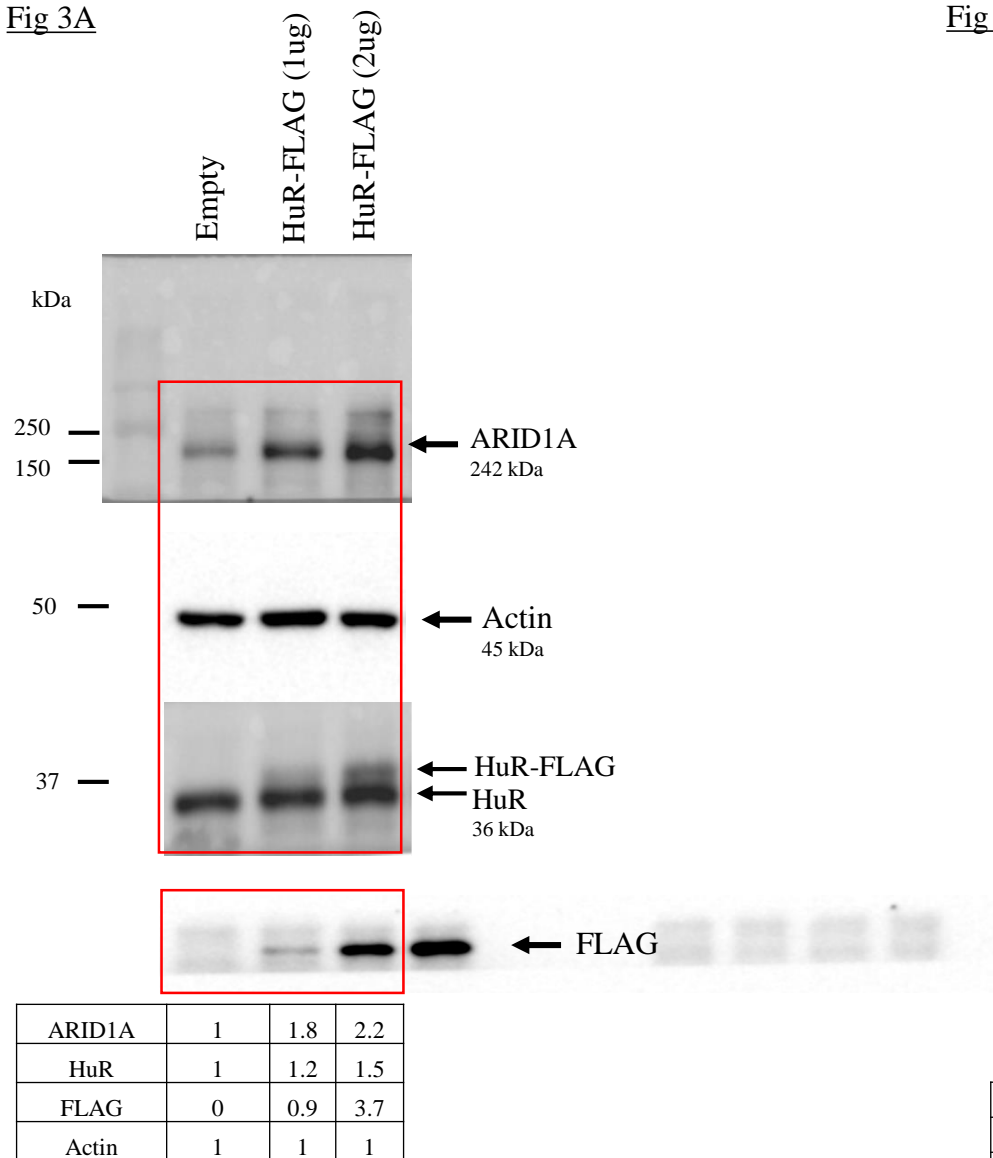

**Fig 3C**

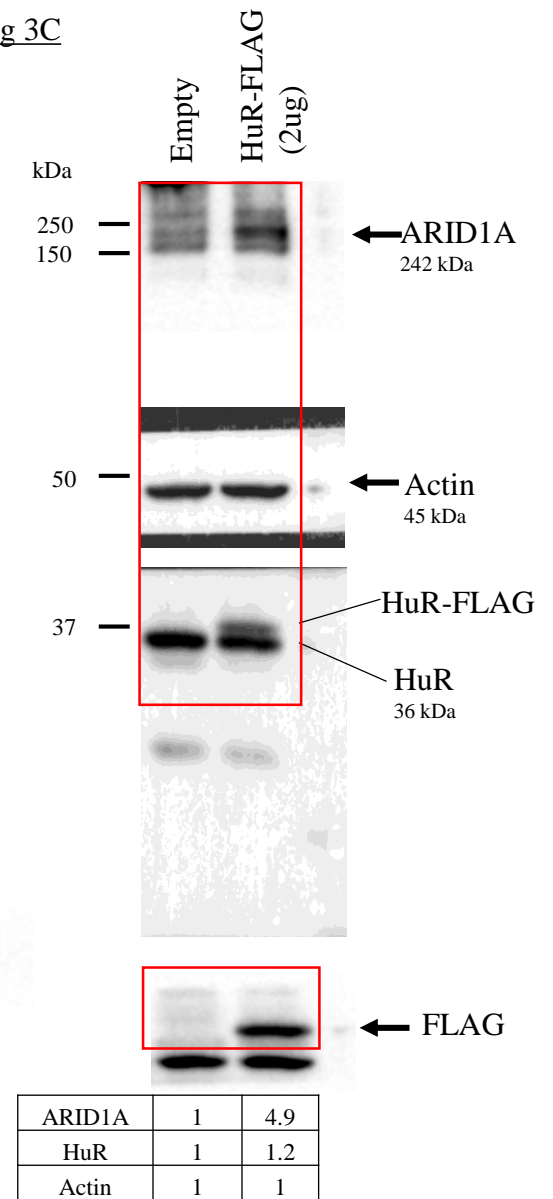

Fig 4C

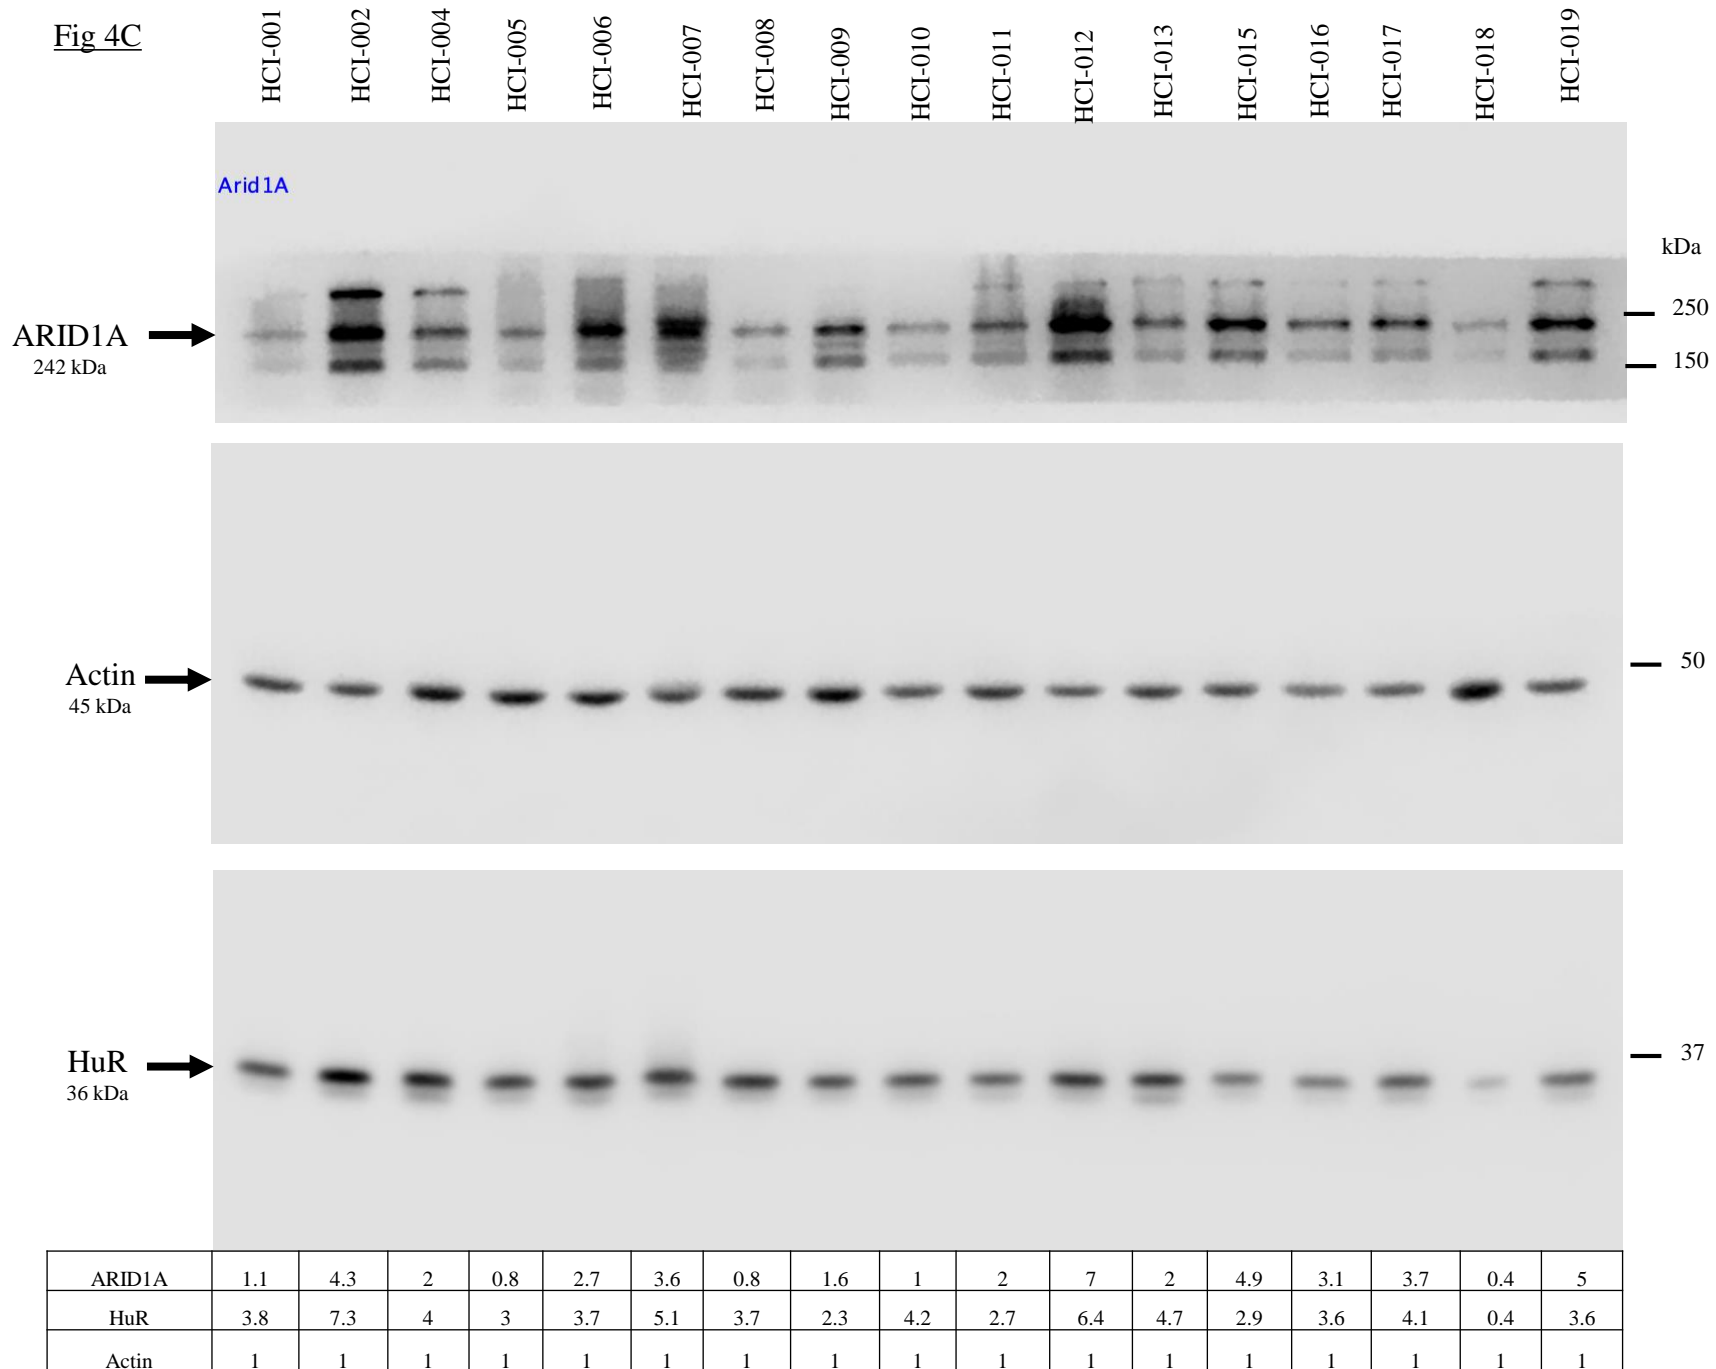

Fig 5A

Fig 5B

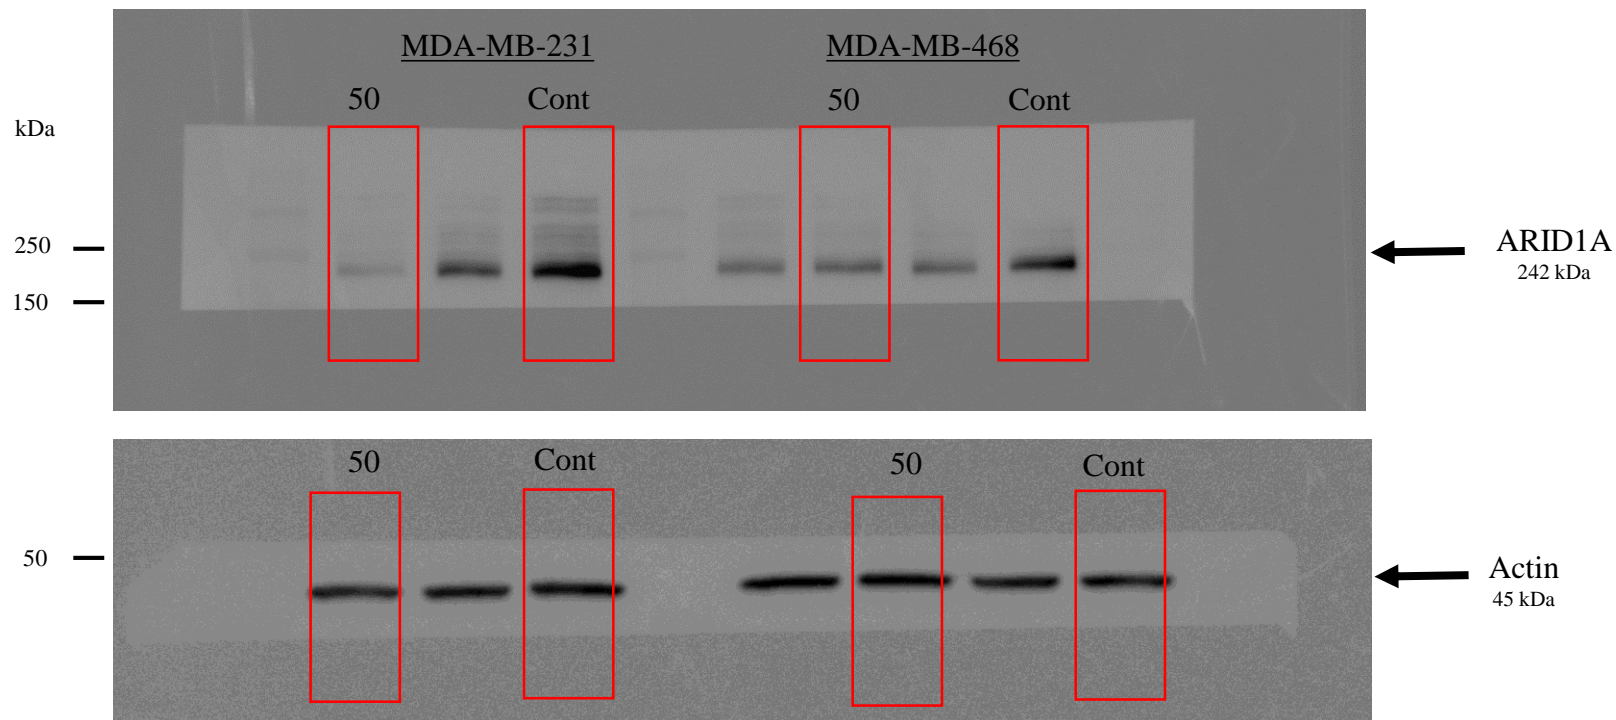

|        | 50  |  | Cont |
|--------|-----|--|------|
| ARID1A | 0.2 |  | 1    |
| Actin  | 1   |  | 1    |

|        | 50  |  | Cont |
|--------|-----|--|------|
| ARID1A | 0.5 |  | 1    |
| Actin  | 1   |  | 1    |

Fig 5C

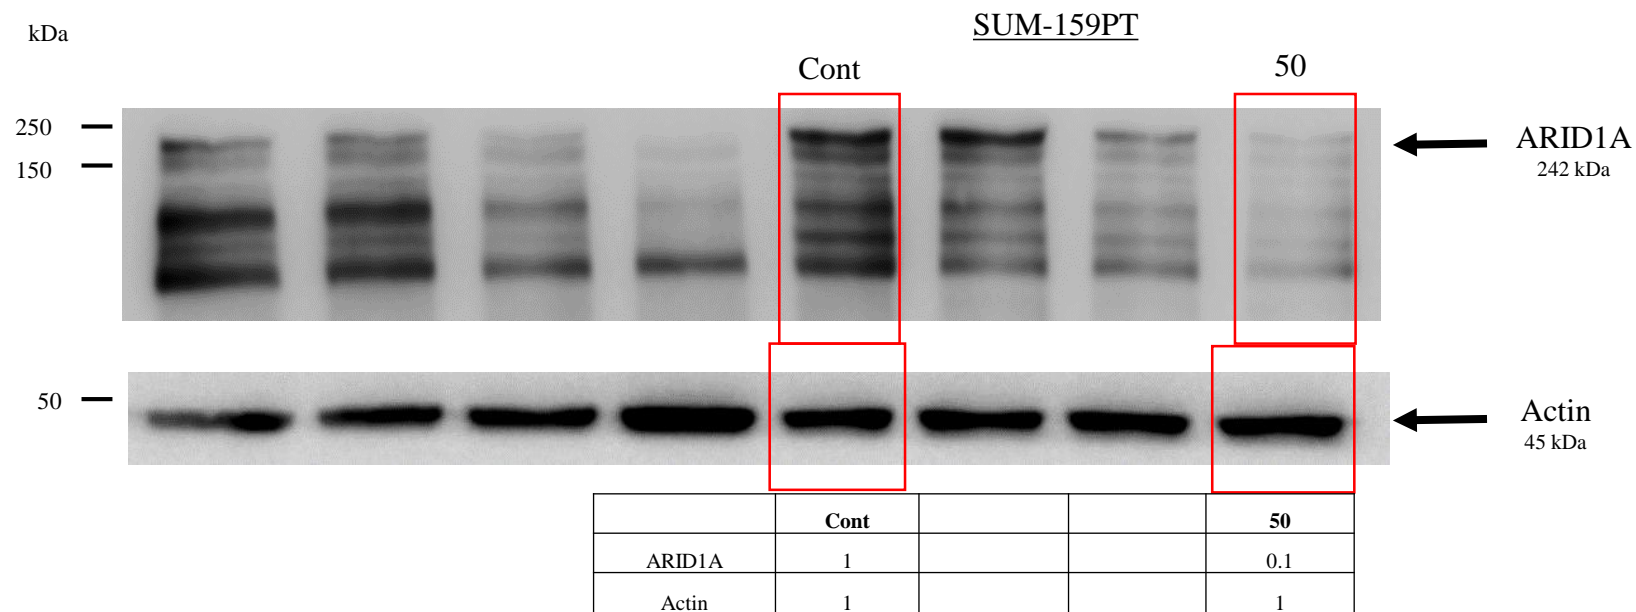

**Fig 6A**

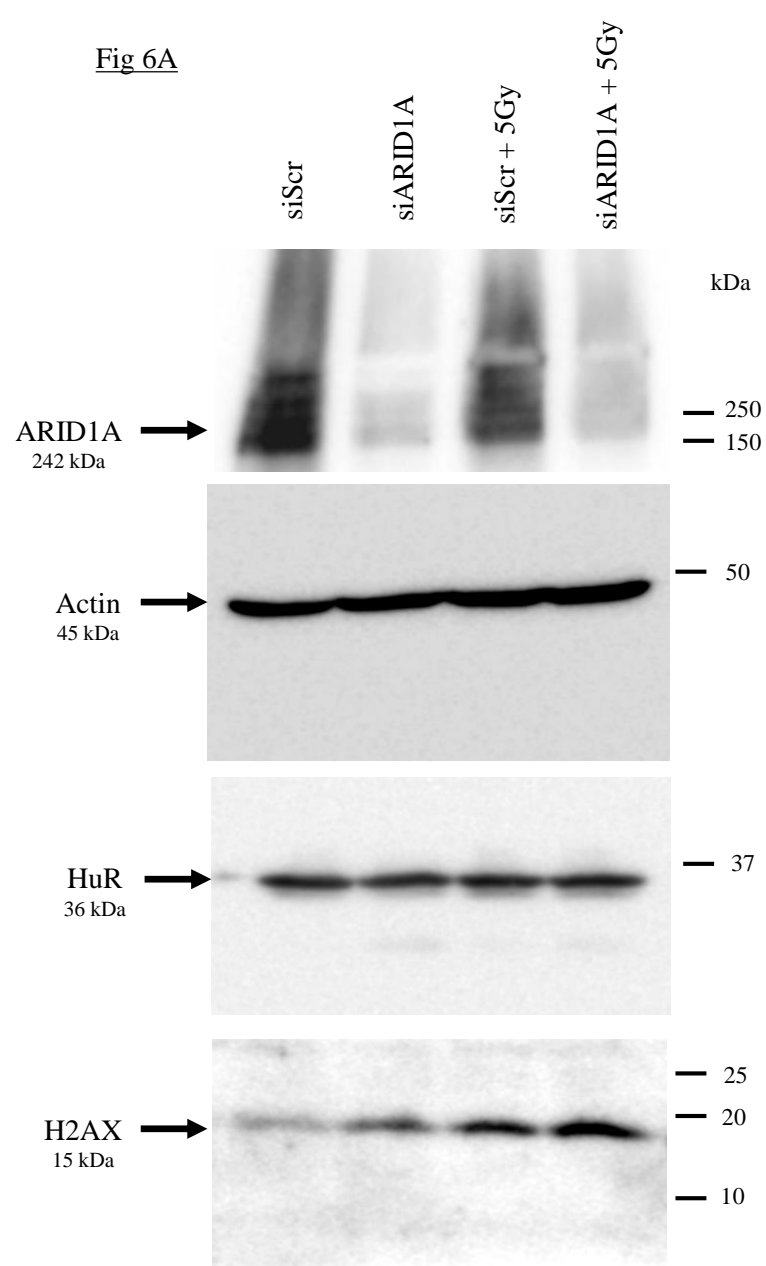

|               |   |     |     |     |
|---------------|---|-----|-----|-----|
| ARID1A        | 1 | 0.2 | 0.7 | 0.2 |
| $\gamma$ H2AX | 1 | 3.2 | 4.7 | 8   |
| HuR           | 1 | 1   | 0.9 | 1   |
| Actin         | 1 | 1   | 1   | 1   |



Fig 6C

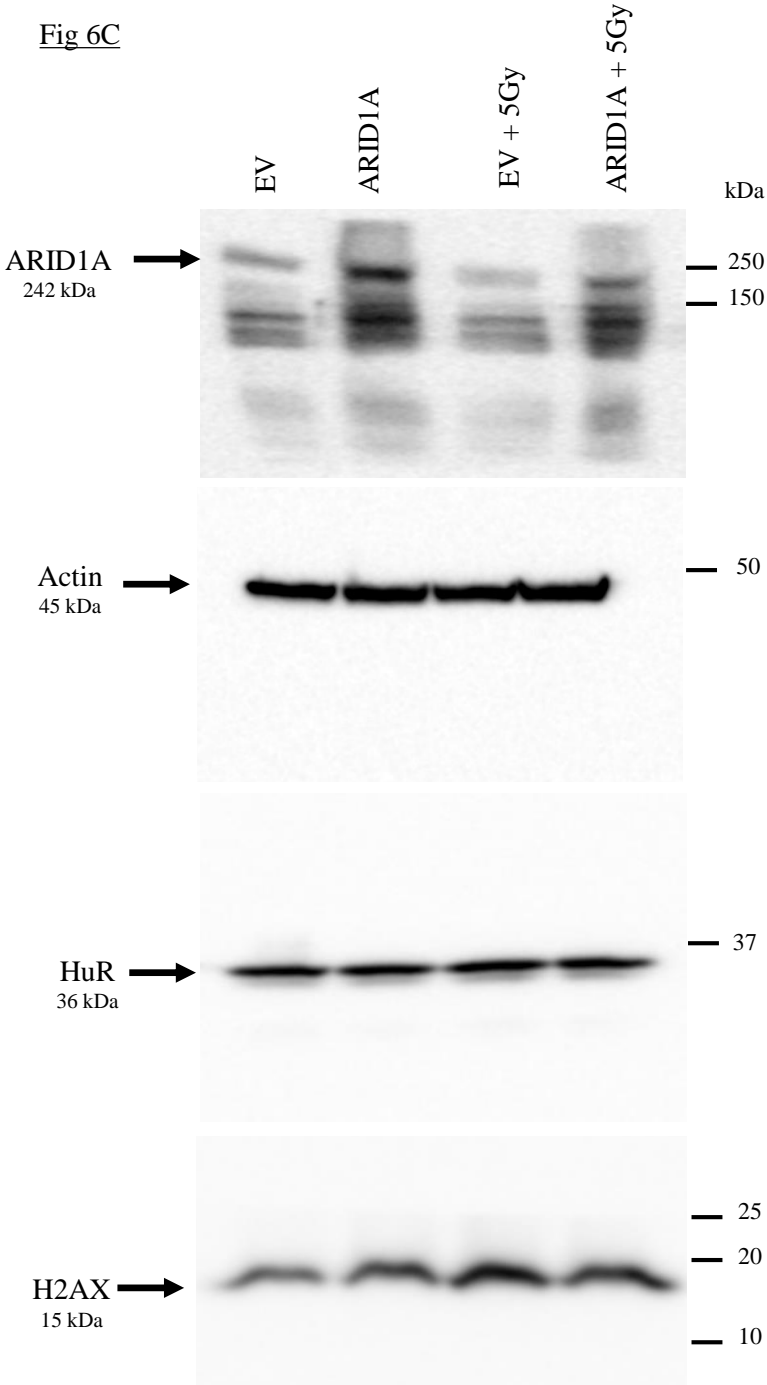

|               | EV | ARID1A | EV + 5Gy | ARID1A + 5Gy |
|---------------|----|--------|----------|--------------|
| ARID1A        | 1  | 2.1    | 1        | 1.5          |
| $\gamma$ H2AX | 1  | 1.7    | 2.8      | 1.6          |
| HuR           | 1  | 1      | 1.1      | 0.9          |
| Actin         | 1  | 1      | 1        | 1            |
